# Supplementary material for: Coastal ocean acidification and increasing total alkalinity in the northwestern Mediterranean Sea
Source: Copernicus journal article supplement (doi:10.5194/os-13-411-2017), 2017-05-15
Supplement: Supplementary file 1 [file os-13-411-2017-supplement.pdf]

Supplement of Ocean Sci., 13, 411–426, 2017  
<http://www.ocean-sci.net/13/411/2017/>  
doi:10.5194/os-13-411-2017-supplement  
© Author(s) 2017. CC Attribution 3.0 License.

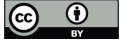

*Supplement of*

## **Coastal ocean acidification and increasing total alkalinity in the northwestern Mediterranean Sea**

**Lydia Kapsenberg et al.**

*Correspondence to:* Jean-Pierre Gattuso ([gattuso@obs-vlfr.fr](mailto:gattuso@obs-vlfr.fr))

The copyright of individual parts of the supplement might differ from the CC-BY 3.0 licence.

1 **Data Supplement**

2

3 **Table S1.** Climatological monthly means  $\pm$  SD (*N*) for carbonate chemistry parameters at Point  
 4 B, at 1 and 50 m for the period 2007-2015, for salinity (*S*), temperature (*T*), dissolved inorganic  
 5 carbon (*C<sub>T</sub>*), total alkalinity (*A<sub>T</sub>*), pH (*pH<sub>T</sub>*, total hydrogen ion scale), *pCO<sub>2</sub>*, and aragonite  
 6 saturation state ( $\Omega_a$ ).

| <i>Month</i> | <i>S</i>              | <i>T</i> (°C)         | <i>C<sub>T</sub></i> ( $\mu\text{mol kg}^{-1}$ ) | <i>A<sub>T</sub></i> ( $\mu\text{mol kg}^{-1}$ ) | <i>pH<sub>T</sub></i> | <i>pCO<sub>2</sub></i> ( $\mu\text{atm}$ ) | $\Omega_a$           |
|--------------|-----------------------|-----------------------|--------------------------------------------------|--------------------------------------------------|-----------------------|--------------------------------------------|----------------------|
| <b>1 m</b>   |                       |                       |                                                  |                                                  |                       |                                            |                      |
| Jan          | 37.89 $\pm$ 0.42 (38) | 14.38 $\pm$ 0.76 (36) | 2251 $\pm$ 8 (38)                                | 2551 $\pm$ 10 (38)                               | 8.13 $\pm$ 0.01 (36)  | 346 $\pm$ 10 (36)                          | 3.19 $\pm$ 0.09 (36) |
| Feb          | 37.95 $\pm$ 0.23 (32) | 13.58 $\pm$ 0.41 (32) | 2259 $\pm$ 11 (32)                               | 2555 $\pm$ 8 (32)                                | 8.14 $\pm$ 0.01 (32)  | 343 $\pm$ 10 (32)                          | 3.14 $\pm$ 0.06 (32) |
| Mar          | 37.86 $\pm$ 0.25 (35) | 13.67 $\pm$ 0.49 (35) | 2259 $\pm$ 10 (35)                               | 2555 $\pm$ 8 (35)                                | 8.14 $\pm$ 0.01 (35)  | 344 $\pm$ 10 (35)                          | 3.14 $\pm$ 0.06 (35) |
| Apr          | 37.76 $\pm$ 0.24 (34) | 15.04 $\pm$ 1.08 (34) | 2254 $\pm$ 11 (34)                               | 2553 $\pm$ 9 (34)                                | 8.12 $\pm$ 0.02 (34)  | 357 $\pm$ 16(34)                           | 3.19 $\pm$ 0.08 (34) |
| May          | 37.64 $\pm$ 0.26 (37) | 18.08 $\pm$ 1.31 (37) | 2241 $\pm$ 20 (37)                               | 2547 $\pm$ 17 (37)                               | 8.09 $\pm$ 0.02 (37)  | 390 $\pm$ 21 (37)                          | 3.31 $\pm$ 0.09 (37) |
| Jun          | 37.74 $\pm$ 0.17 (37) | 21.29 $\pm$ 1.77 (37) | 2233 $\pm$ 18 (37)                               | 2543 $\pm$ 14 (37)                               | 8.05 $\pm$ 0.02 (37)  | 436 $\pm$ 29 (37)                          | 3.41 $\pm$ 0.11 (37) |
| Jul          | 37.93 $\pm$ 0.17 (40) | 24.06 $\pm$ 1.55 (40) | 2227 $\pm$ 14 (40)                               | 2549 $\pm$ 13 (40)                               | 8.02 $\pm$ 0.03 (40)  | 469 $\pm$ 33 (40)                          | 3.57 $\pm$ 0.10 (40) |
| Aug          | 38.08 $\pm$ 0.12 (30) | 24.77 $\pm$ 1.35 (30) | 2226 $\pm$ 14 (30)                               | 2555 $\pm$ 10 (30)                               | 8.02 $\pm$ 0.03 (30)  | 471 $\pm$ 37 (30)                          | 3.65 $\pm$ 0.10 (30) |
| Sep          | 38.21 $\pm$ 0.11 (32) | 23.48 $\pm$ 1.23 (31) | 2229 $\pm$ 10 (31)                               | 2562 $\pm$ 9 (32)                                | 8.04 $\pm$ 0.03 (30)  | 443 $\pm$ 33 (30)                          | 3.66 $\pm$ 0.09 (30) |
| Oct          | 38.19 $\pm$ 0.10 (33) | 20.82 $\pm$ 1.09 (33) | 2226 $\pm$ 10 (33)                               | 2561 $\pm$ 9 (33)                                | 8.08 $\pm$ 0.02 (33)  | 394 $\pm$ 18 (33)                          | 3.63 $\pm$ 0.08 (33) |
| Nov          | 37.99 $\pm$ 0.27 (37) | 18.20 $\pm$ 0.99 (36) | 2230 $\pm$ 13 (37)                               | 2555 $\pm$ 12 (37)                               | 8.11 $\pm$ 0.01 (36)  | 366 $\pm$ 14 (36)                          | 3.48 $\pm$ 0.07 (36) |
| Dec          | 37.97 $\pm$ 0.25 (32) | 16.14 $\pm$ 1.12 (32) | 2241 $\pm$ 12 (32)                               | 2555 $\pm$ 12 (32)                               | 8.13 $\pm$ 0.02 (32)  | 352 $\pm$ 16 (32)                          | 3.35 $\pm$ 0.06 (32) |
| <b>50 m</b>  |                       |                       |                                                  |                                                  |                       |                                            |                      |
| Jan          | 38.02 $\pm$ 0.11 (37) | 14.49 $\pm$ 0.71 (35) | 2253 $\pm$ 9 (37)                                | 2554 $\pm$ 6 (37)                                | 8.13 $\pm$ 0.01 (35)  | 347 $\pm$ 10 (35)                          | 3.18 $\pm$ 0.07 (35) |
| Feb          | 38.03 $\pm$ 0.10 (32) | 13.71 $\pm$ 0.43 (32) | 2259 $\pm$ 11(32)                                | 2556 $\pm$ 7 (32)                                | 8.13 $\pm$ 0.01 (32)  | 343 $\pm$ 9 (32)                           | 3.12 $\pm$ 0.06 (32) |
| Mar          | 38.01 $\pm$ 0.12 (35) | 13.59 $\pm$ 0.39 (35) | 2260 $\pm$ 9 (35)                                | 2554 $\pm$ 8 (35)                                | 8.13 $\pm$ 0.01 (35)  | 346 $\pm$ 9 (35)                           | 3.09 $\pm$ 0.05 (35) |
| Apr          | 37.98 $\pm$ 0.10 (34) | 14.06 $\pm$ 0.57 (34) | 2258 $\pm$ 11 (34)                               | 2553 $\pm$ 8 (34)                                | 8.12 $\pm$ 0.01 (34)  | 351 $\pm$ 11 (34)                          | 3.10 $\pm$ 0.08 (34) |
| May          | 37.99 $\pm$ 0.11 (37) | 15.01 $\pm$ 0.85 (37) | 2253 $\pm$ 16 (37)                               | 2551 $\pm$ 10 (37)                               | 8.12 $\pm$ 0.02 (37)  | 360 $\pm$ 16 (37)                          | 3.15 $\pm$ 0.10 (37) |
| Jun          | 38.00 $\pm$ 0.09 (37) | 15.06 $\pm$ 0.59 (37) | 2249 $\pm$ 16 (37)                               | 2548 $\pm$ 11 (37)                               | 8.12 $\pm$ 0.01 (37)  | 358 $\pm$ 12 (37)                          | 3.16 $\pm$ 0.08 (37) |
| Jul          | 38.01 $\pm$ 0.07 (39) | 15.43 $\pm$ 1.12 (39) | 2246 $\pm$ 14 (39)                               | 2546 $\pm$ 9 (39)                                | 8.11 $\pm$ 0.02 (39)  | 363 $\pm$ 21 (39)                          | 3.16 $\pm$ 0.10 (39) |
| Aug          | 37.99 $\pm$ 0.07 (28) | 15.27 $\pm$ 0.66 (28) | 2240 $\pm$ 10 (28)                               | 2543 $\pm$ 8 (28)                                | 8.12 $\pm$ 0.01 (28)  | 353 $\pm$ 12 (28)                          | 3.20 $\pm$ 0.07 (28) |
| Sep          | 38.00 $\pm$ 0.11 (32) | 16.20 $\pm$ 1.69 (31) | 2237 $\pm$ 13 (31)                               | 2547 $\pm$ 11 (32)                               | 8.12 $\pm$ 0.02 (30)  | 357 $\pm$ 22 (30)                          | 3.29 $\pm$ 0.17 (30) |
| Oct          | 38.11 $\pm$ 0.13 (33) | 18.49 $\pm$ 1.83 (33) | 2233 $\pm$ 12 (33)                               | 2554 $\pm$ 12 (33)                               | 8.10 $\pm$ 0.02 (33)  | 377 $\pm$ 21 (33)                          | 3.43 $\pm$ 0.15 (33) |
| Nov          | 38.09 $\pm$ 0.11 (36) | 17.95 $\pm$ 1.19 (35) | 2234 $\pm$ 14 (36)                               | 2557 $\pm$ 9 (36)                                | 8.11 $\pm$ 0.02 (35)  | 366 $\pm$ 15 (35)                          | 3.43 $\pm$ 0.12 (35) |
| Dec          | 38.04 $\pm$ 0.16 (32) | 16.20 $\pm$ 1.10 (32) | 2241 $\pm$ 11 (32)                               | 2556 $\pm$ 9 (32)                                | 8.12 $\pm$ 0.02 (32)  | 352 $\pm$ 14 (32)                          | 3.33 $\pm$ 0.08 (32) |

7

8 **Table S2.** Regression analyses on monthly trends of  $A_T$  and  $C_T$  ( $\mu\text{mol kg}^{-1} \text{yr}^{-1}$ ) for the period  
 9 2007-2015, at 1 m.

| <i>Parameter</i>                     | <i>Month</i> | <i>Slope</i> $\pm$ <i>SE</i> | <i>Intercept</i> $\pm$ <i>SE</i> | <i>F</i> <sub>1,7</sub> | <i>Slope P</i> | <i>R</i> <sup>2</sup> |
|--------------------------------------|--------------|------------------------------|----------------------------------|-------------------------|----------------|-----------------------|
| $A_T$<br>( $\mu\text{mol kg}^{-1}$ ) | Jan          | -1.33 $\pm$ 0.83             | 5225 $\pm$ 1677                  | 0.2666                  | 0.155          | 0.267                 |
|                                      | Feb          | 1.09 $\pm$ 0.93              | 366 $\pm$ 1874                   | 0.1632                  | 0.281          | 0.163                 |
|                                      | Mar          | 1.48 $\pm$ 0.81              | -418 $\pm$ 1628                  | 0.3227                  | 0.111          | 0.323                 |
|                                      | Apr          | 1.77 $\pm$ 0.84              | -1010 $\pm$ 1688                 | 0.3886                  | 0.073          | 0.389                 |
|                                      | May          | 4.00 $\pm$ 1.58              | -5498 $\pm$ 3183                 | 0.4771                  | 0.039          | 0.477                 |
|                                      | Jun          | 4.53 $\pm$ 0.90              | -6566 $\pm$ 1802                 | 0.785                   | 0.001          | 0.785                 |
|                                      | Jul          | 3.36 $\pm$ 1.03              | -4201 $\pm$ 2080                 | 0.6007                  | 0.014          | 0.601                 |
|                                      | Aug          | 2.01 $\pm$ 1.07              | -1490 $\pm$ 2152                 | 0.3355                  | 0.102          | 0.336                 |
|                                      | Sep          | 1.81 $\pm$ 0.86              | -1075 $\pm$ 1723                 | 0.3886                  | 0.073          | 0.389                 |
|                                      | Oct          | 1.39 $\pm$ 0.94              | -225 $\pm$ 1884                  | 0.238                   | 0.183          | 0.238                 |
|                                      | Nov          | 1.89 $\pm$ 1.23              | -1254 $\pm$ 2465                 | 0.2542                  | 0.166          | 0.254                 |
|                                      | Dec          | 2.00 $\pm$ 1.29              | -1470 $\pm$ 2596                 | 0.2556                  | 0.165          | 0.256                 |
| $C_T$<br>( $\mu\text{mol kg}^{-1}$ ) | Jan          | -0.14 $\pm$ 0.46             | 2536 $\pm$ 922                   | 0.0135                  | 0.766          | 0.014                 |
|                                      | Feb          | 2.64 $\pm$ 0.90              | -3052 $\pm$ 1806                 | 0.5526                  | 0.022          | 0.553                 |
|                                      | Mar          | 2.32 $\pm$ 0.77              | -2411 $\pm$ 1550                 | 0.5644                  | 0.02           | 0.564                 |
|                                      | Apr          | 2.93 $\pm$ 0.84              | -3637 $\pm$ 1697                 | 0.6324                  | 0.01           | 0.632                 |
|                                      | May          | 5.06 $\pm$ 1.82              | -7936 $\pm$ 3663                 | 0.5244                  | 0.027          | 0.524                 |
|                                      | Jun          | 5.72 $\pm$ 1.26              | -9260 $\pm$ 2540                 | 0.7452                  | 0.003          | 0.745                 |
|                                      | Jul          | 4.27 $\pm$ 0.91              | -6369 $\pm$ 1838                 | 0.7575                  | 0.002          | 0.758                 |
|                                      | Aug          | 3.37 $\pm$ 1.17              | -4541 $\pm$ 2357                 | 0.5407                  | 0.024          | 0.541                 |
|                                      | Sep          | 1.80 $\pm$ 1.05              | -1383 $\pm$ 2117                 | 0.2935                  | 0.132          | 0.294                 |
|                                      | Oct          | 2.84 $\pm$ 0.65              | -3480 $\pm$ 1312                 | 0.73                    | 0.003          | 0.73                  |
|                                      | Nov          | 2.57 $\pm$ 1.34              | -2932 $\pm$ 2693                 | 0.3442                  | 0.097          | 0.344                 |
|                                      | Dec          | 1.70 $\pm$ 1.25              | -1175 $\pm$ 2506                 | 0.2098                  | 0.215          | 0.21                  |

10

11 **Figure S1.** Precipitation at Nice airport (weekly cumulative precipitation from Tuesday to  
12 Monday) during the period 2007-2015 (a) and its relationship to  $A_T$  (b) and salinity (c) at Point  
13 B, 1 m.

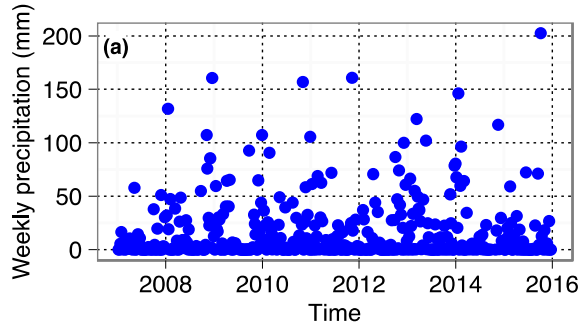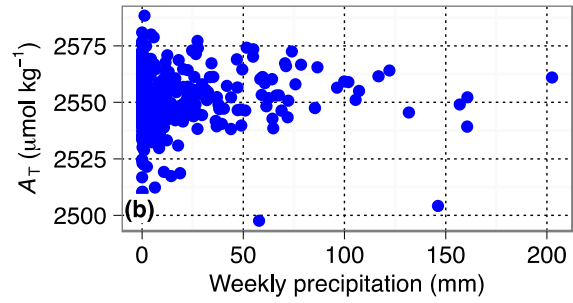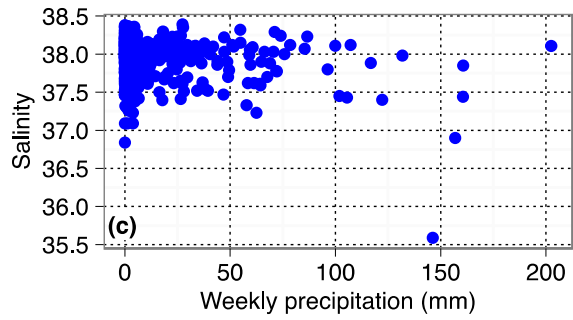

14
